# Supplementary material for: Genome-Wide Datasets of Chicories (Cichorium intybus L.) for Marker-Assisted Crop Breeding Applications: A Systematic Review and Meta-Analysis
Source: MDPI journal article supplement (doi:10.3390/ijms241411663), 2023-07-19

**Figure S1:** Marker Assisted Breeding (MAB) map representing the position of SSR and SNP markers, developed by various authors on the chicory genome assembly JAKNSD01 (in the center). Specifically, on the left are the SSR sequences (by the authors: Cadalen et al. [25], Ince et al. [29], Patella et al., [13], and Zavada et al., [30]), while on the right are all the SNPs markers retrieved from the map built by Palumbo et al [28] and Muys et al., [27]. For the SSR marker from Cadalen et al. [25], and the SNP markers from Palumbo et al. [28], their position on the corresponding linkage group is also graphically indicated, distance in cM (on the flanks of the figure). The contigs are assigned to their respective chromosomes due to the mapping of the markers.

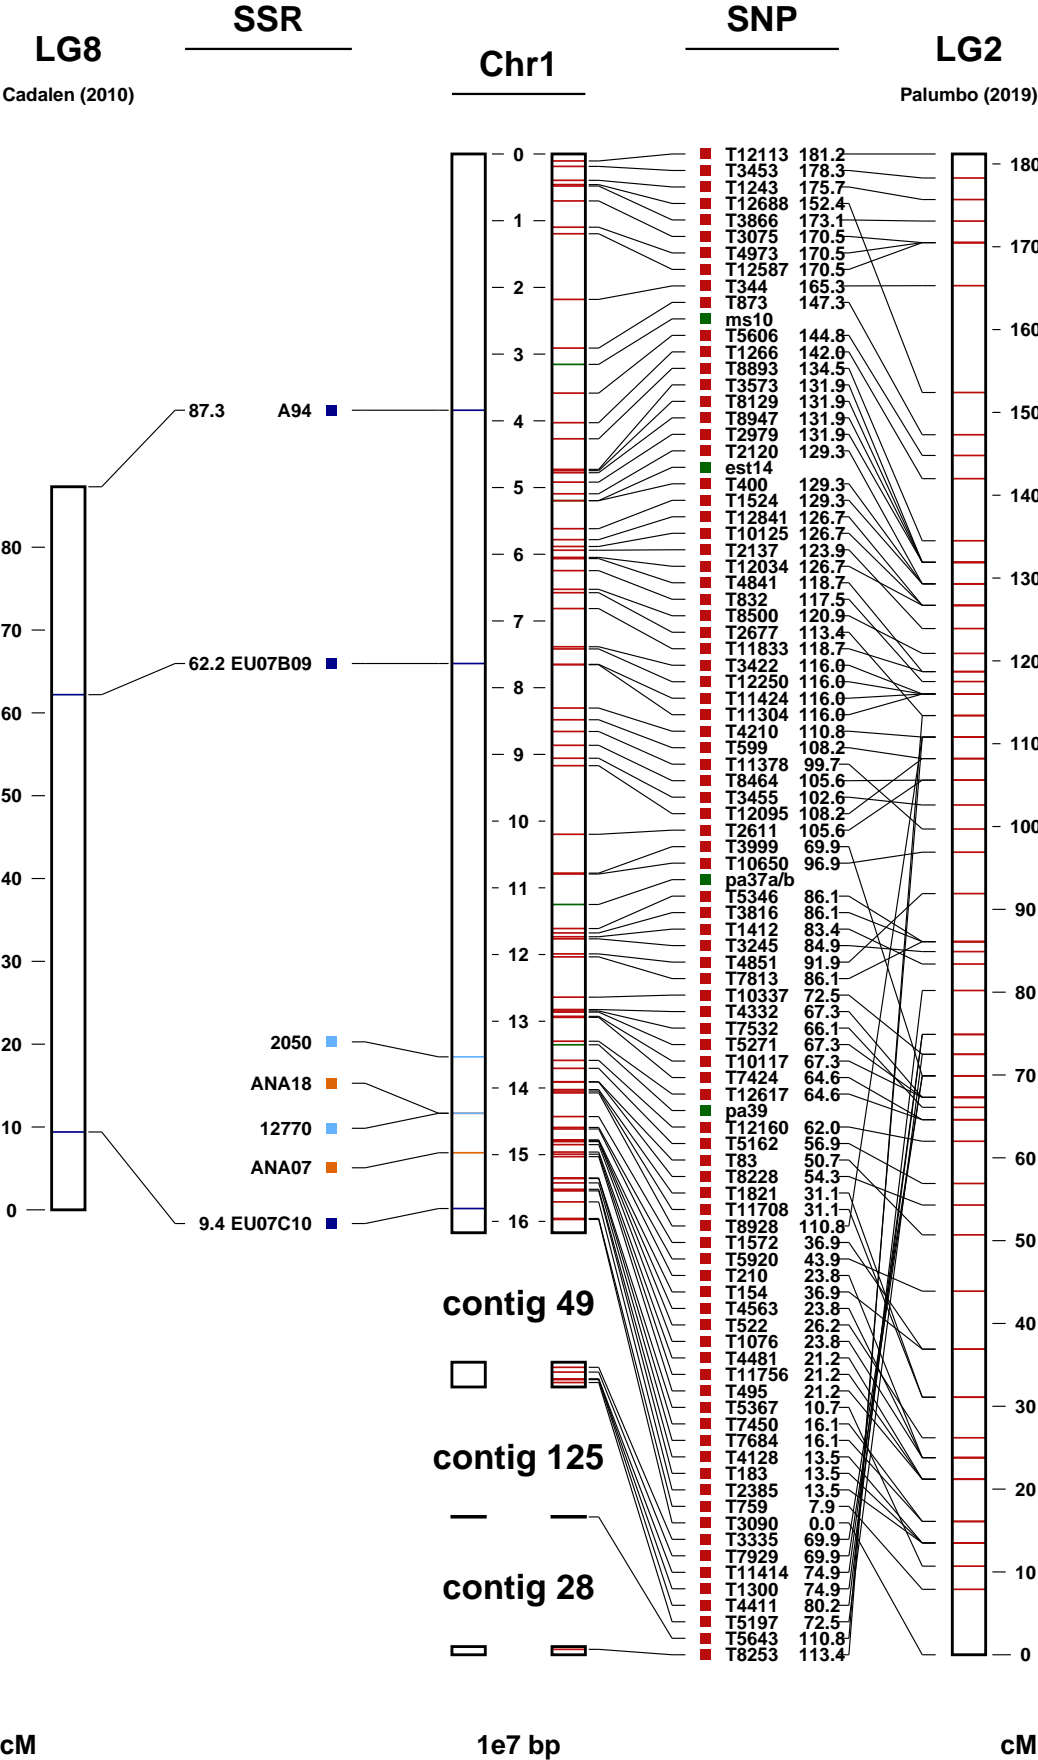

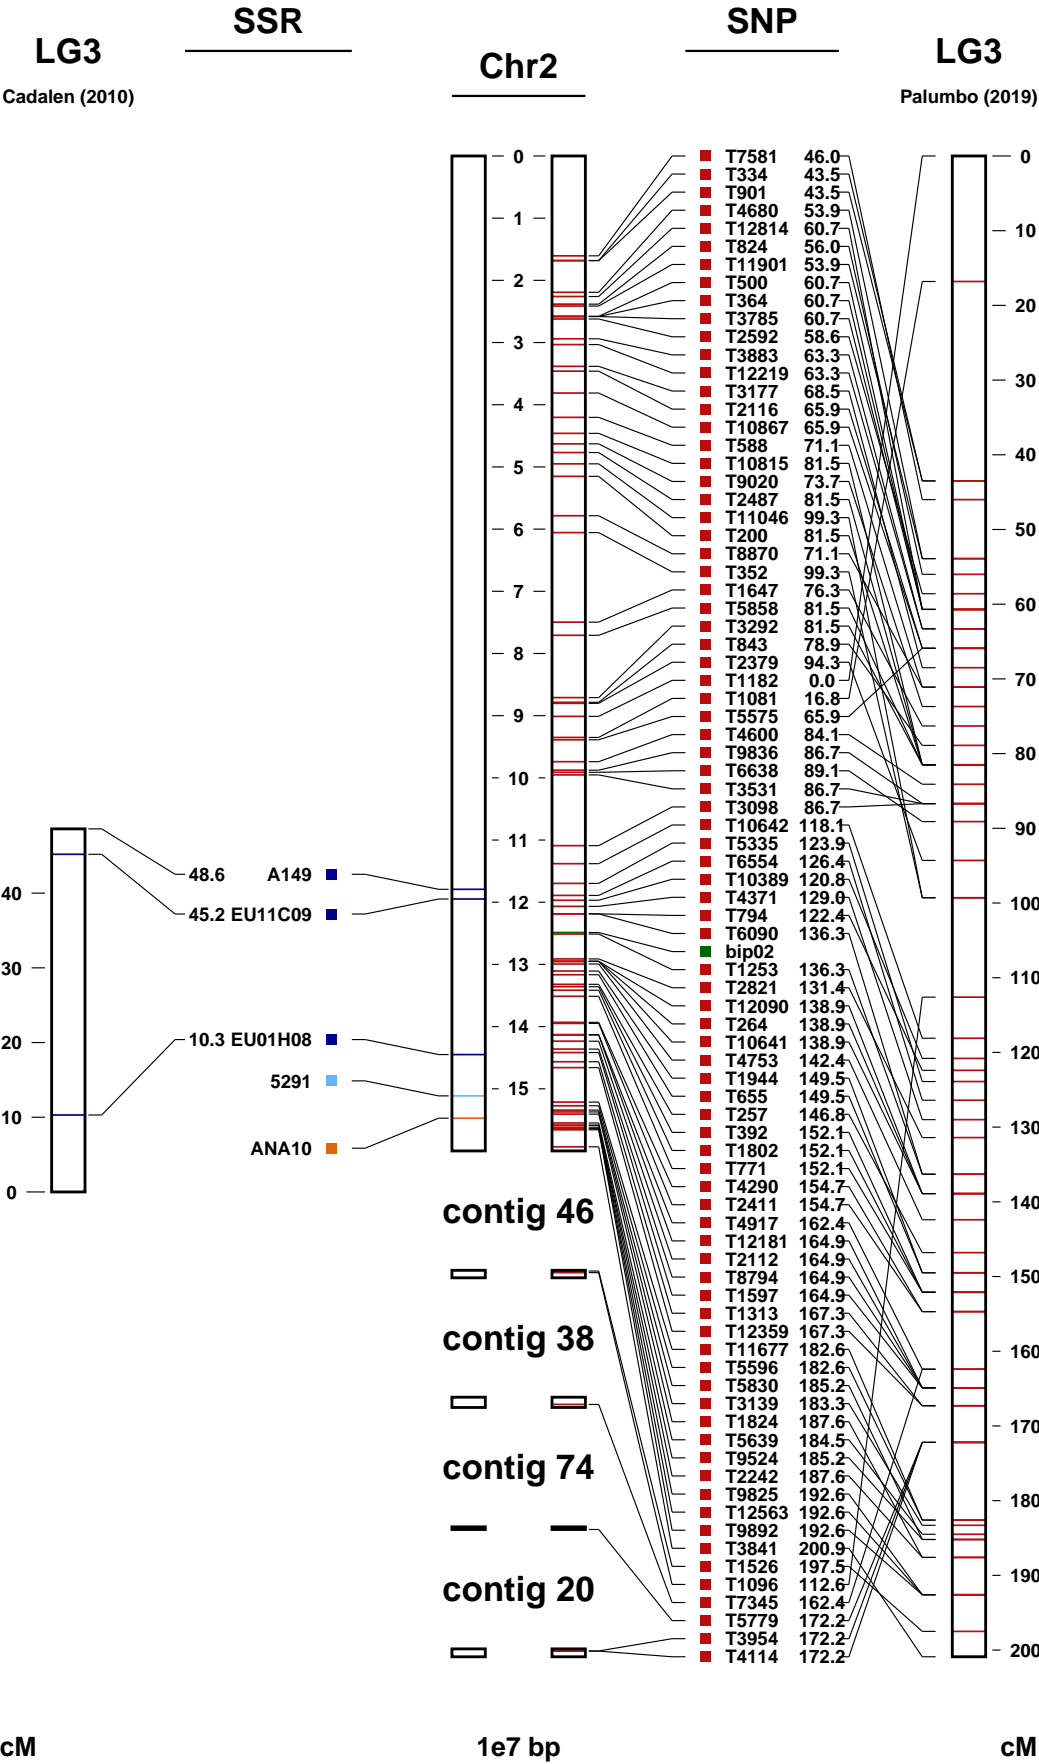

cM

1e7 bp

cM

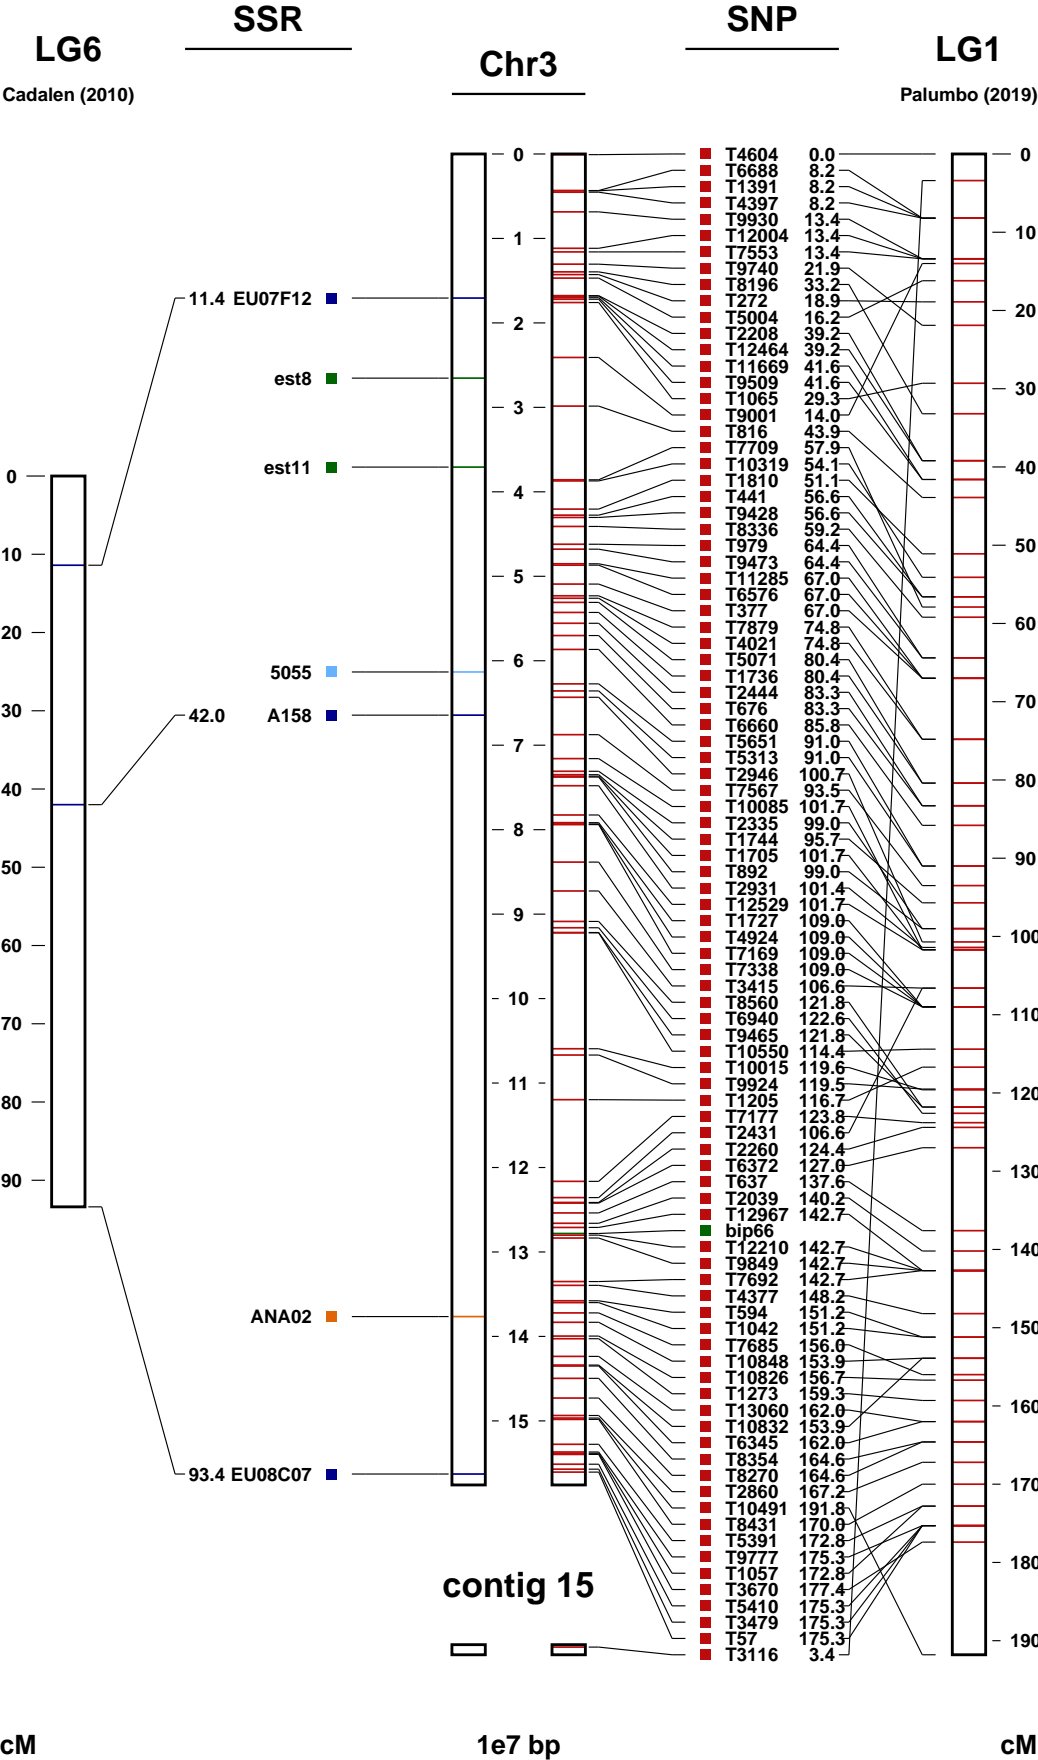



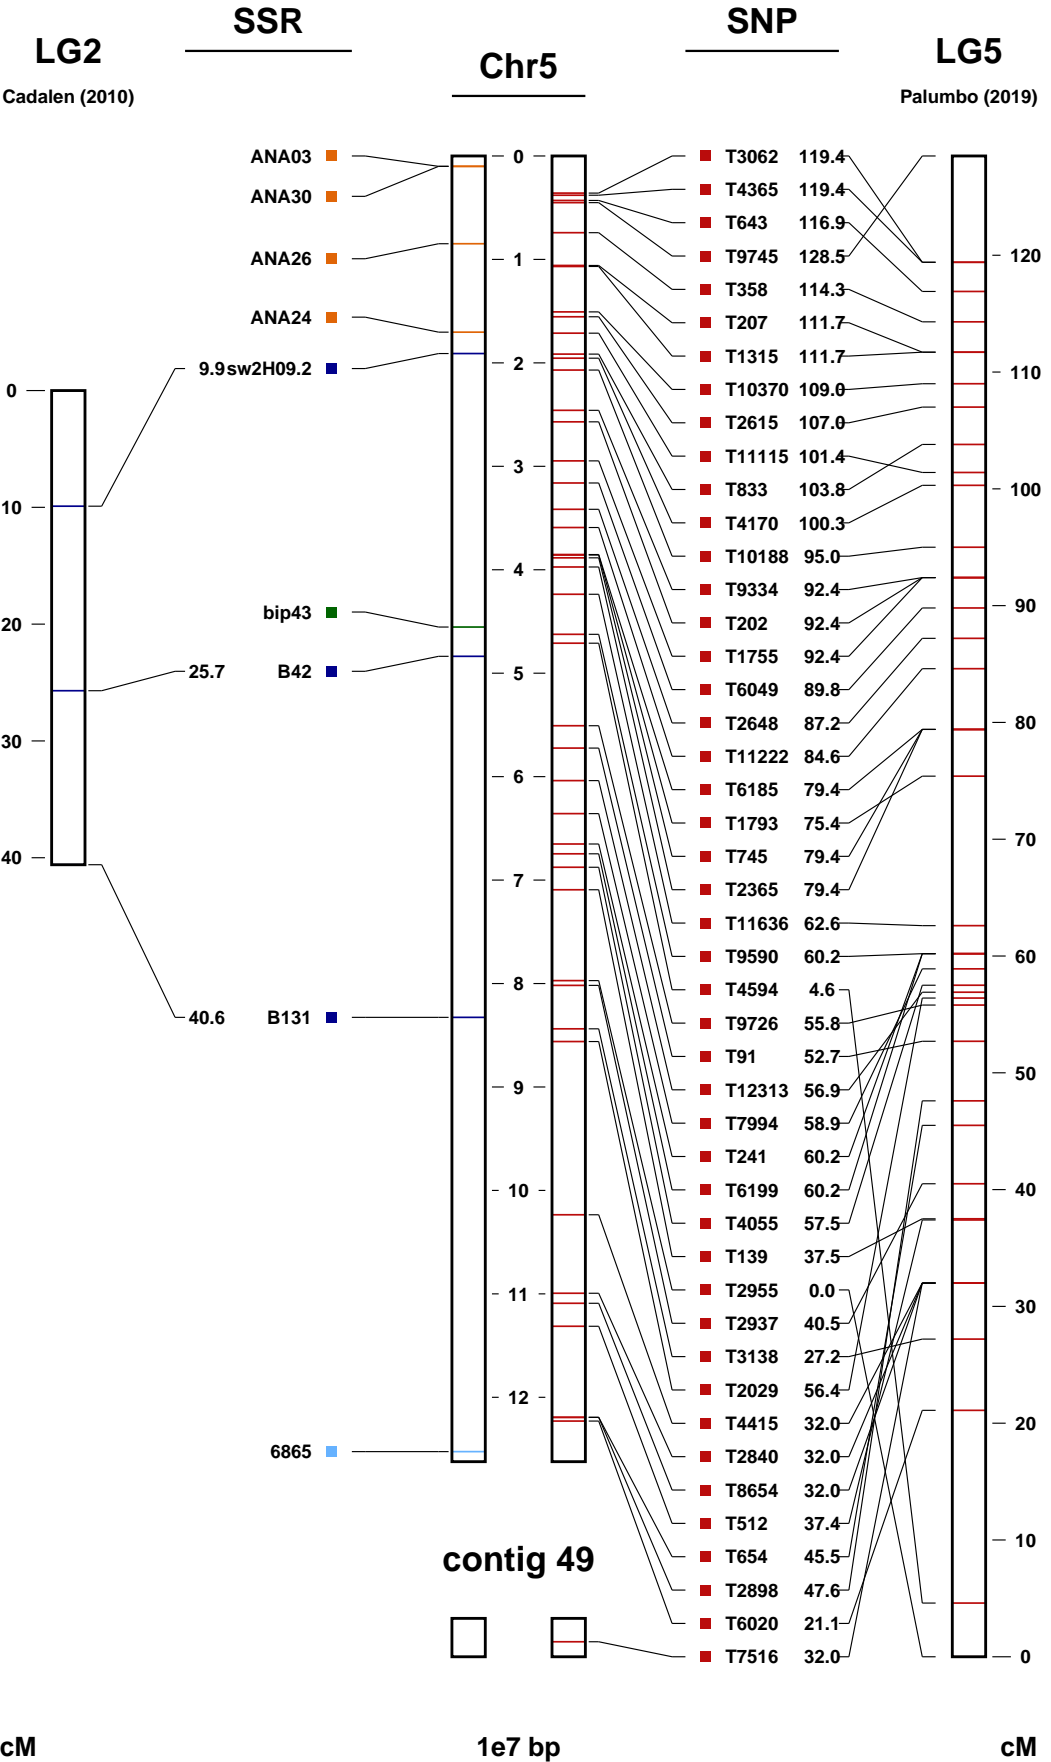



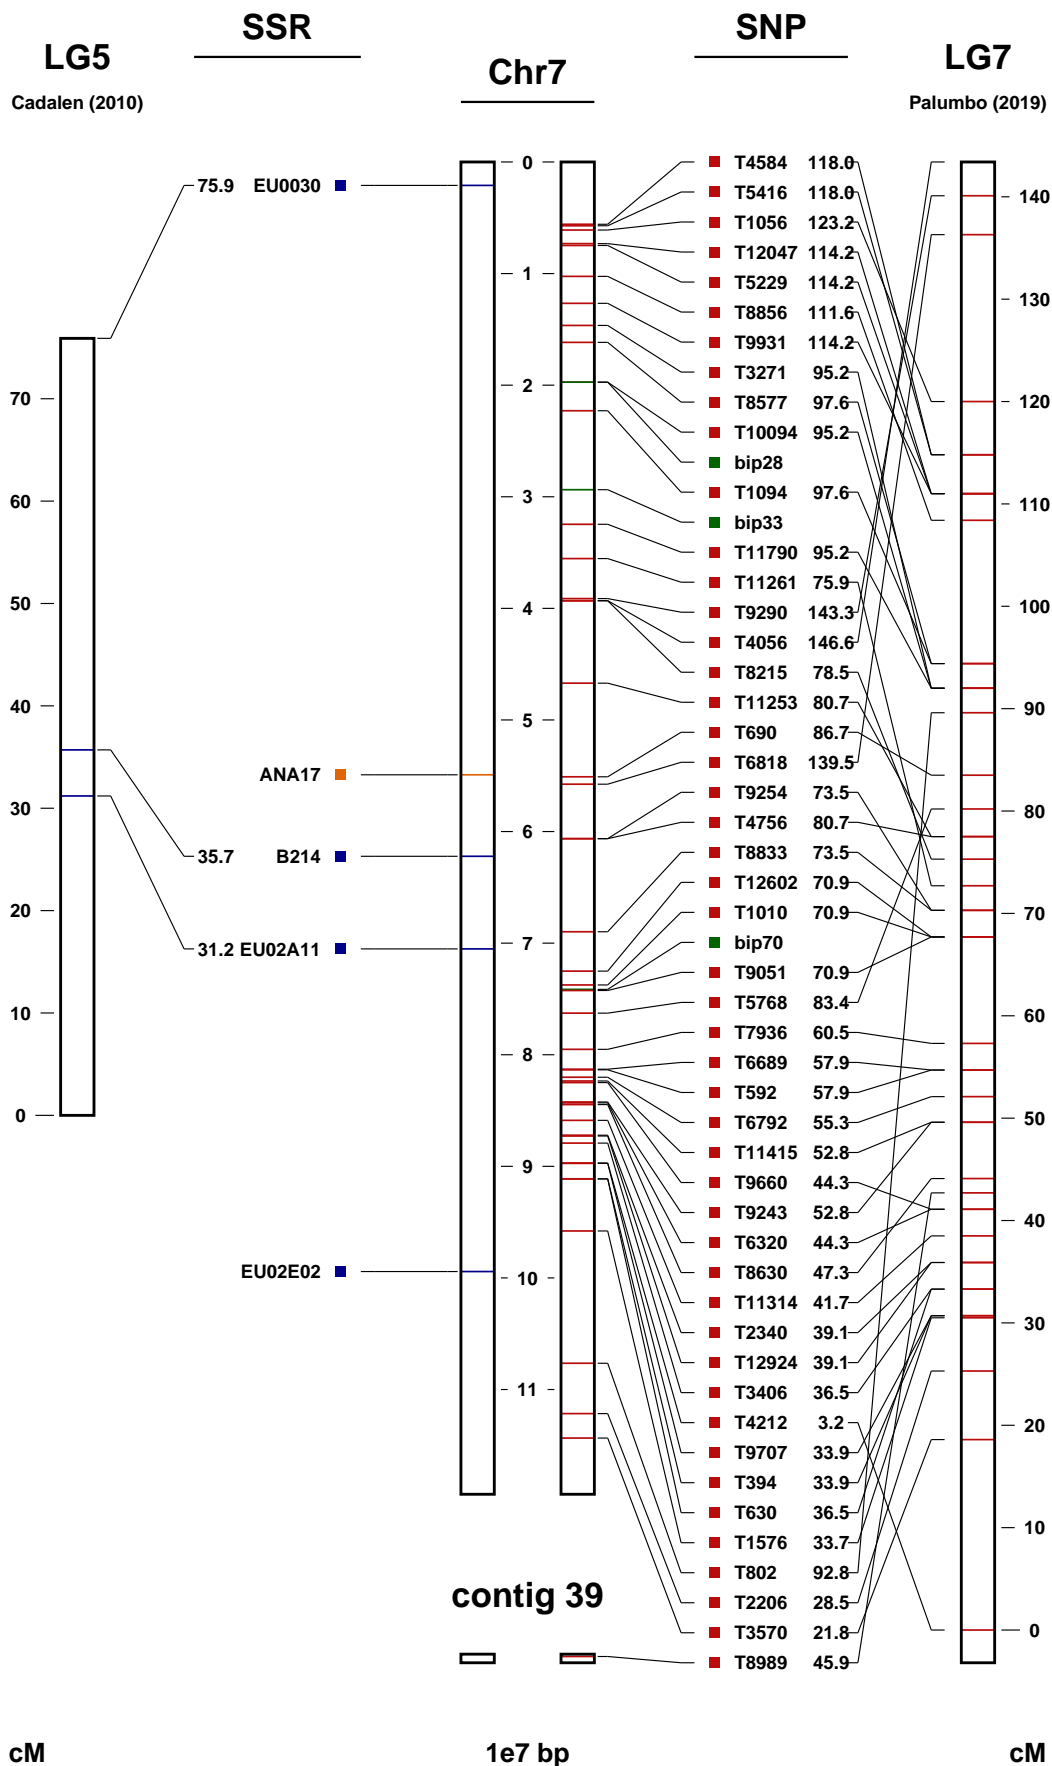



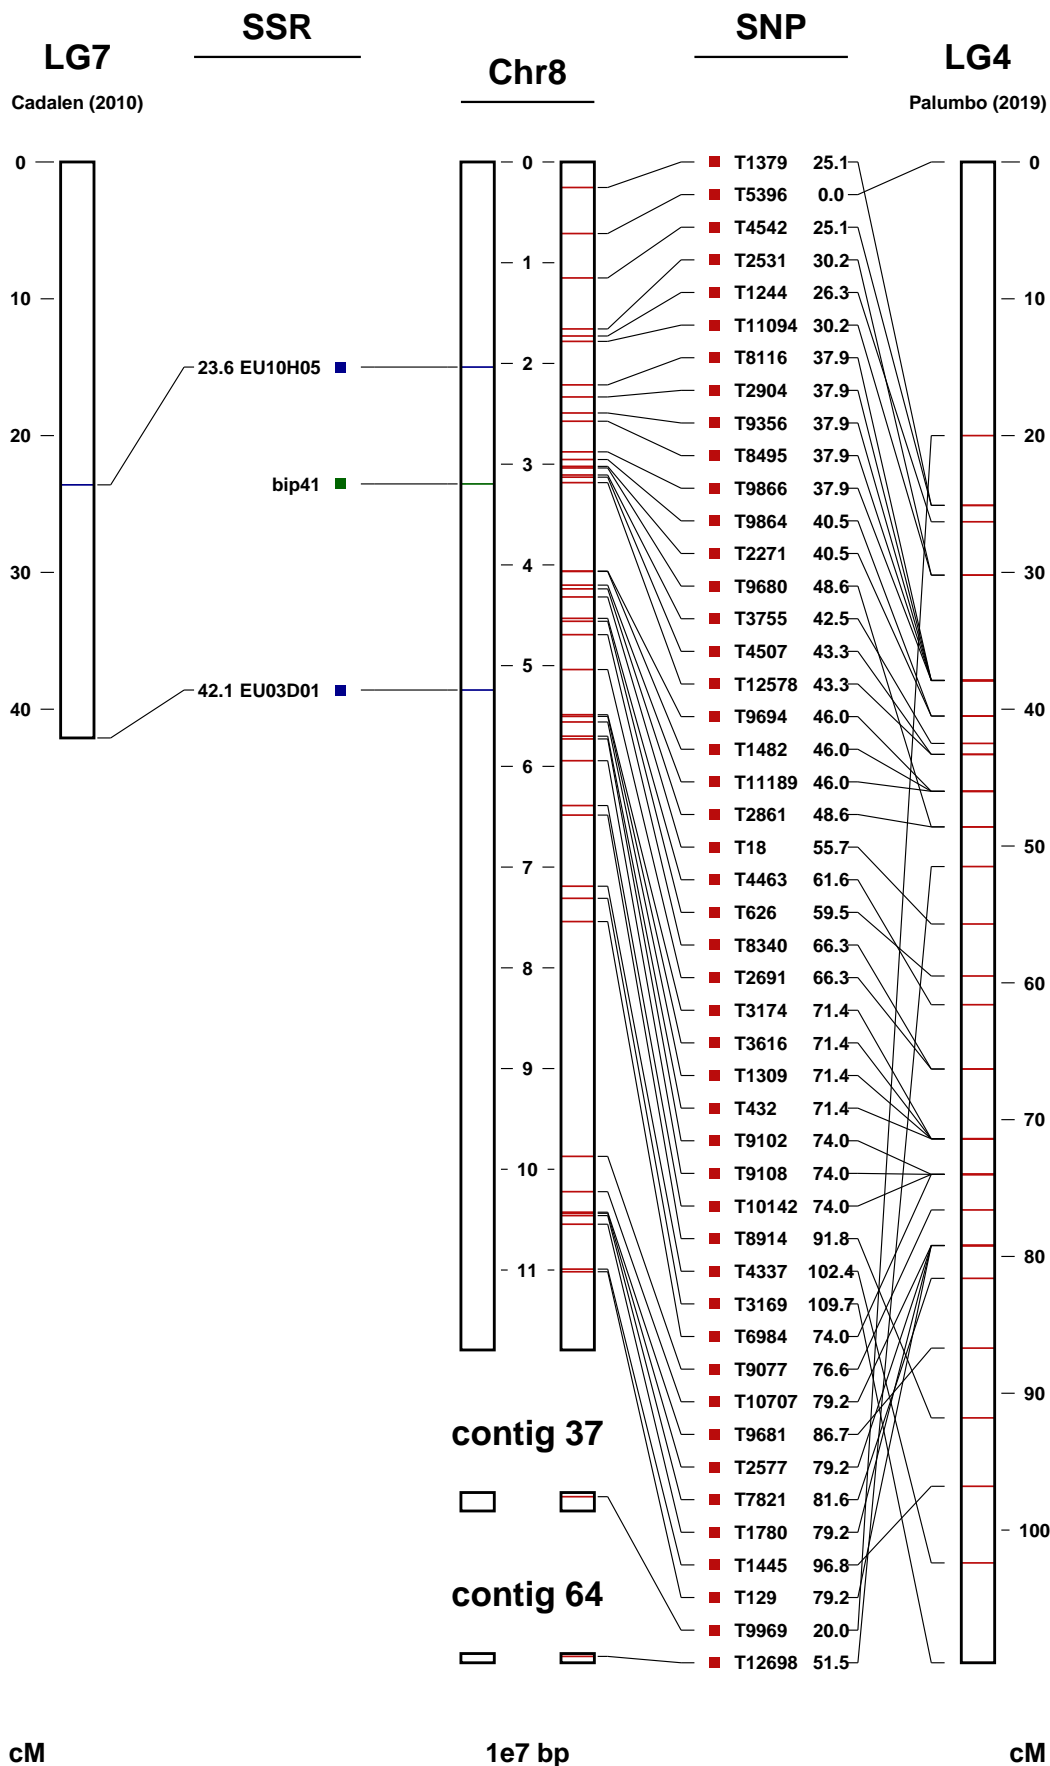

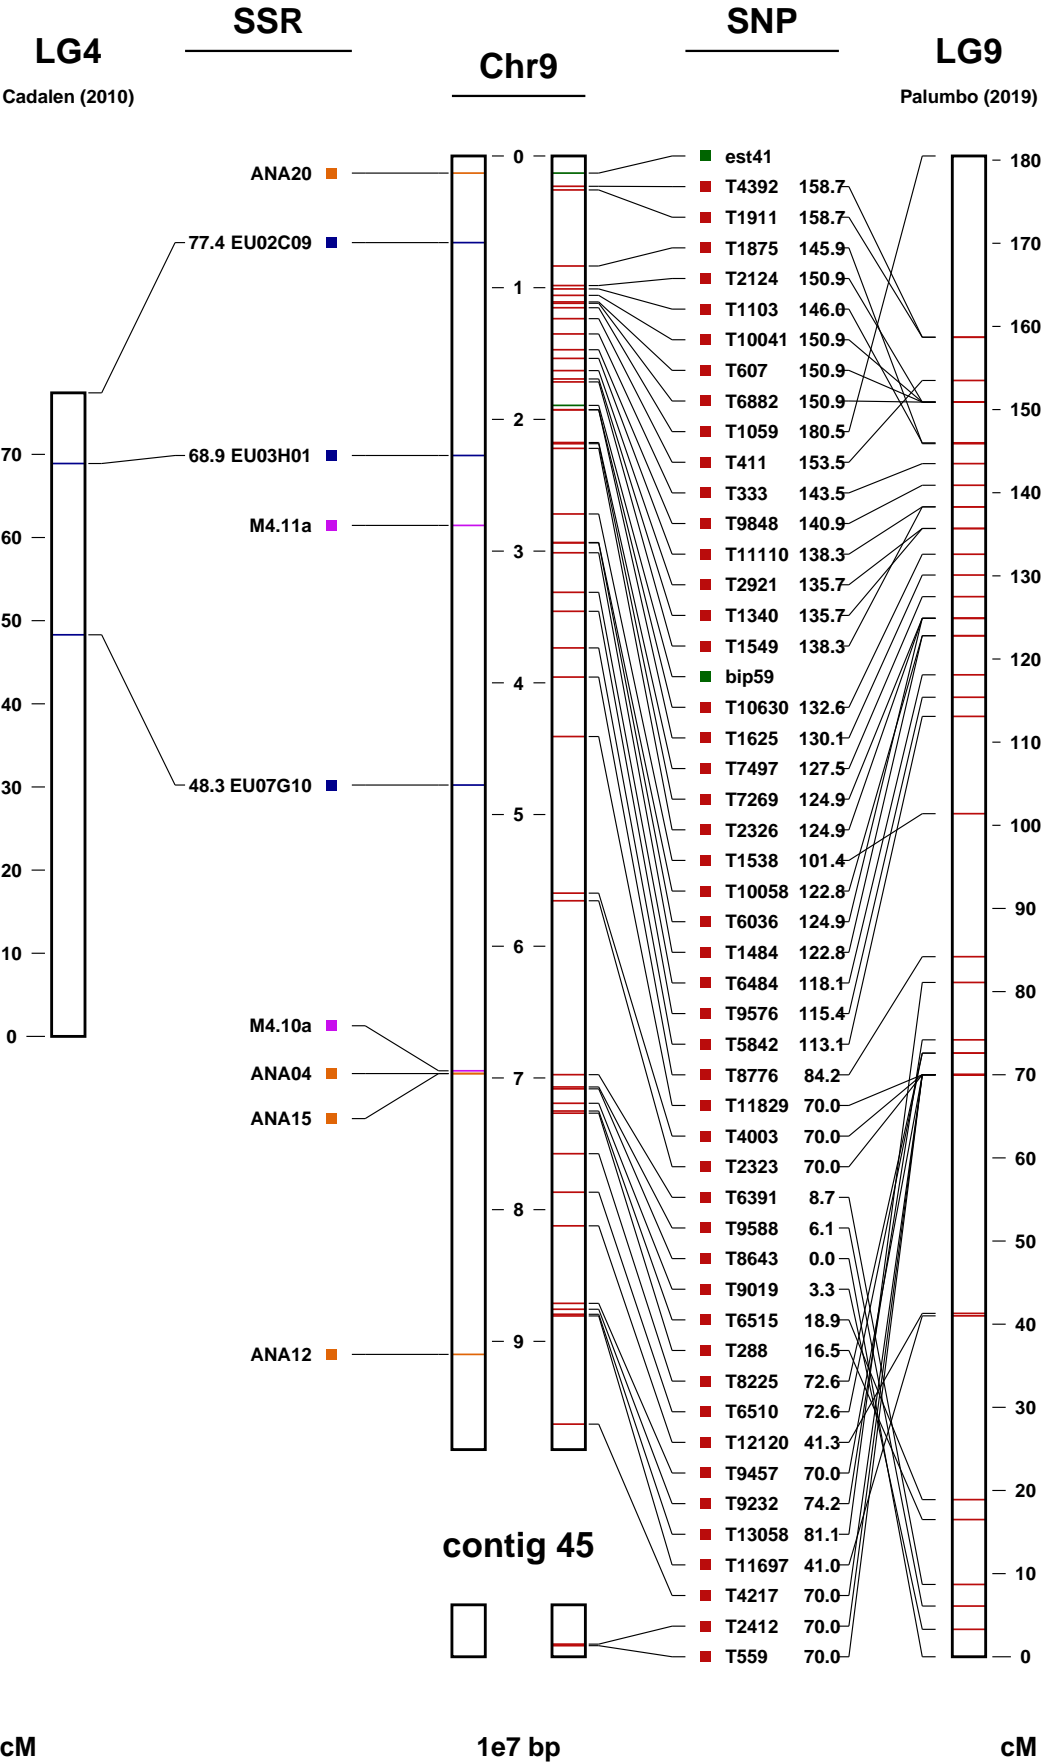

Supplement: s1 [file s1]
